# Supplementary material for: Oxygen evolution from BF3/MnO4−
Source: Royal Society of Chemistry journal article supplement (doi:10.1039/c1cc00019e), 2011-01-01
Supplement: c1cc00019e.pdf [file c1cc00019e.pdf]

## Supporting information

### Oxygen Evolution from $\text{BF}_3/\text{MnO}_4^-$

Shek-Man Yiu, Wai-Lun Man, Xin Wang, William W. Y. Lam, Siu-Mui Ng, Hoi-Ki

Kwong, Kai-Chung Lau\* and Tai-Chu Lau\*

Institute of Molecular Functional Materials and Department of Biology and Chemistry,  
City University of Hong Kong, Tat Chee Avenue, Hong Kong, China.

Contents:

1. Experimental details.
2. Possible singlet and triplet decomposition pathways (Fig. S1) of 1:2 adduct  $[\text{MnO}_4^- \cdot 2\text{BF}_3]$ .
3. Potential energy profiles (Fig. S2) of the singlet and triplet (**A**, **B** and **C**) reaction pathways of 1:2 adduct  $[\text{MnO}_4^- \cdot 2\text{BF}_3]$ .
4. Possible singlet and triplet decomposition pathways (Fig. S3) of 1:1 adduct  $[\text{MnO}_4^- \cdot \text{BF}_3]$ .
5. Potential energy profiles (Fig. S4) of the singlet and triplet (**D** and **E**) reaction pathways of 1:1 adduct  $[\text{MnO}_4^- \cdot \text{BF}_3]$ .
6. Optimized structures (Fig. S5) of the species involved in the triplet and singlet decomposition reactions of 1:2 adduct  $[\text{MnO}_4^- \cdot 2\text{BF}_3]$ .
7. Optimized structures (Fig. S6) of the species involved in the triplet and singlet decomposition reactions of 1:1 adduct  $[\text{MnO}_4^- \cdot \text{BF}_3]$ .

**Materials. CAUTION:** *Care should be taken in handling  $\text{BF}_3/\text{MnO}_4^-$  in organic solvents, since the system is very reactive. Although we have not encountered any problems so far, the amount of  $\text{MnO}_4^-$  used each time should be less than 50 mg.* Potassium permanganate (Aldrich, 97%) was recrystallized from water.<sup>1</sup>  ${}^n\text{Bu}_4\text{N}[\text{MnO}_4]^{2-}$  and  ${}^{18}\text{O}$ -labeled  $\text{K}[\text{MnO}_4]^{3-}$  were prepared according to literature methods. Boron trifluoride–acetonitrile solution ( $\text{BF}_3 \cdot \text{CH}_3\text{CN}$ ) (Fluka, 15.2 – 16.8%) was stored at  $-20\text{ }^\circ\text{C}$  and used without further purification. The concentration was determined to be 16% by hydrolysis to  $\text{H}_3\text{BO}_3$  and HF followed by titration with standard NaOH solution.  $\text{H}_2{}^{18}\text{O}$  (98 atom %  ${}^{18}\text{O}$ ) was purchased from Medical Isotopes and used as received. Acetonitrile (Labscan, HPLC grade) was purified by Pure Solv<sup>TM</sup> Solvent Purification Systems (Innovative Technology, Inc.).

**Instrumentation.** Electrospray ionization mass spectra (ESI/MS) were obtained on a PE SCIEX API 365 mass spectrometer. The analyte solution was continuously infused with a syringe pump at a constant flow rate of  $5\ \mu\text{L}\ \text{min}^{-1}$  into the pneumatically assisted electrospray probe with nitrogen as the nebulising gas. The declustering potential was typically set at 10–20 V. GC-MS measurements were carried out on a HP 6890 gas chromatograph equipped with a HP-5MS column ( $30\ \text{m} \times 0.25\ \text{mm}\ \text{i.d.}$ ) and interfaced to a HP 5975 mass-selective detector.

**Kinetic and product analysis.** The gas evolved during the experiment was determined as followed. In a typical reaction, a deaerated solution of  $\text{MnO}_4^-$  (0.139 mmol) in  $\text{CH}_3\text{CN}$  (10 mL) was placed in a two neck round bottom flask ( $\sim 16\ \text{mL}$ ) under argon at 293 K. One neck of the flask was connected to a gas burette and the other was sealed with a septum. A solution of deaerated  $\text{BF}_3 \cdot \text{CH}_3\text{CN}$  (1.26 mmol, 1 mL) was added through the septum into the  $\text{MnO}_4^-$  solution with vigorous stirring. The volume of gas evolved was recorded at different time interval. The first-order rate constants,  $k_{\text{O}_2}$ , were obtained by nonlinear least-squares fits of  $Y_t$  versus  $t$  according to

the equation  $Y_t = Y_\infty + (Y_0 - Y_\infty)\exp(-k_{O_2}t)$ , where  $Y_0$  and  $Y_\infty$  are the initial and final  $O_2$  produced (mmol), respectively. The gas was also analyzed by GC-MS.

### **Determination of $O_2$ isotopic composition by GC-MS.**

In a typical reaction, a deaerated solution of 91%  $^{18}O$ -labeled  $KMnO_4$  (0.08 mmol) in  $CH_3CN$  (6 mL) was placed in a vessel (~8 mL) sealed with a septum under argon at 293 K. A solution of  $BF_3 \cdot CH_3CN$  (1.29 mmol, 1 mL) was added into the solution using a gastight syringe. 50  $\mu L$  gas in the headspace was withdrawn after 20 min and analyzed by GC-MS.

### **DFT Calculations**

DFT calculations were carried out using Gaussian 03 program.<sup>4</sup> The Becke's three-parameter nonlocal exchange functional<sup>5</sup> and the Lee, Yang, and Parr nonlocal correlation functional (B3LYP)<sup>6</sup> were utilized, with standard LANL2DZ basis set and relativistic effective core potential (ECP)<sup>7</sup> for Mn, and the 6-31+G(d) basis set for all non-metal atoms. The geometries of all species were fully optimized and the harmonic vibration frequencies were calculated to obtain the zero-point energies (ZPE) and to verify nature [minimum or a transition state (TS)] of stationary points on the potential energy surfaces.

The calculated singlet-triplet splitting (17.3 kcal/mol) of  $MnO_4^-$  at B3LYP/LANL2DZ/6-31+G(d) level is in good agreement with the value (22.8 kcal/mol) obtained at CCSD(T)/LANL2DZ/6-31+G(d) level.

**References:**

- 1 W. L. F. Armarego, D. D. Perrin, *Purification of Laboratory Chemicals*, 4<sup>th</sup> ed.; Reed Educational and Professional Publishing Ltd.: Oxford, England, 1996.
- 2 N. Xie, R. A. Binstead, E. Block, W. D. Chandler, D. G. Lee, T. J. Meyer, M. Thiruvazhi, *J. Org. Chem.* 2000, **65**, 1008-1015.
- 3 K.-H. Z. Heckner, *Phys Chem. (Leipzig)* 1968, **239**, 387-394.
- 4 M. J. Frisch, G. W. Trucks, H. B. Schlegel, G. E. Scuseria, M. A. Robb, J. R. Cheeseman, J. A. Montgomery, T. Vreven, J. A. Pople, et. al.; Gaussian 03, Revision D.01; Gaussian, Inc.: Pittsburgh, PA, 2003.
- 5 A. D. Becke, *J. Chem. Phys.* 1993, **98**, 5648.
- 6 C. Lee, W. Yang, R. G. Parr, *Phys. Rev.* 1988, **B37**, 785.
- 7 P. J. Hay, W. R. Wadt, *J. Chem. Phys.* 1985, **82**, 299.

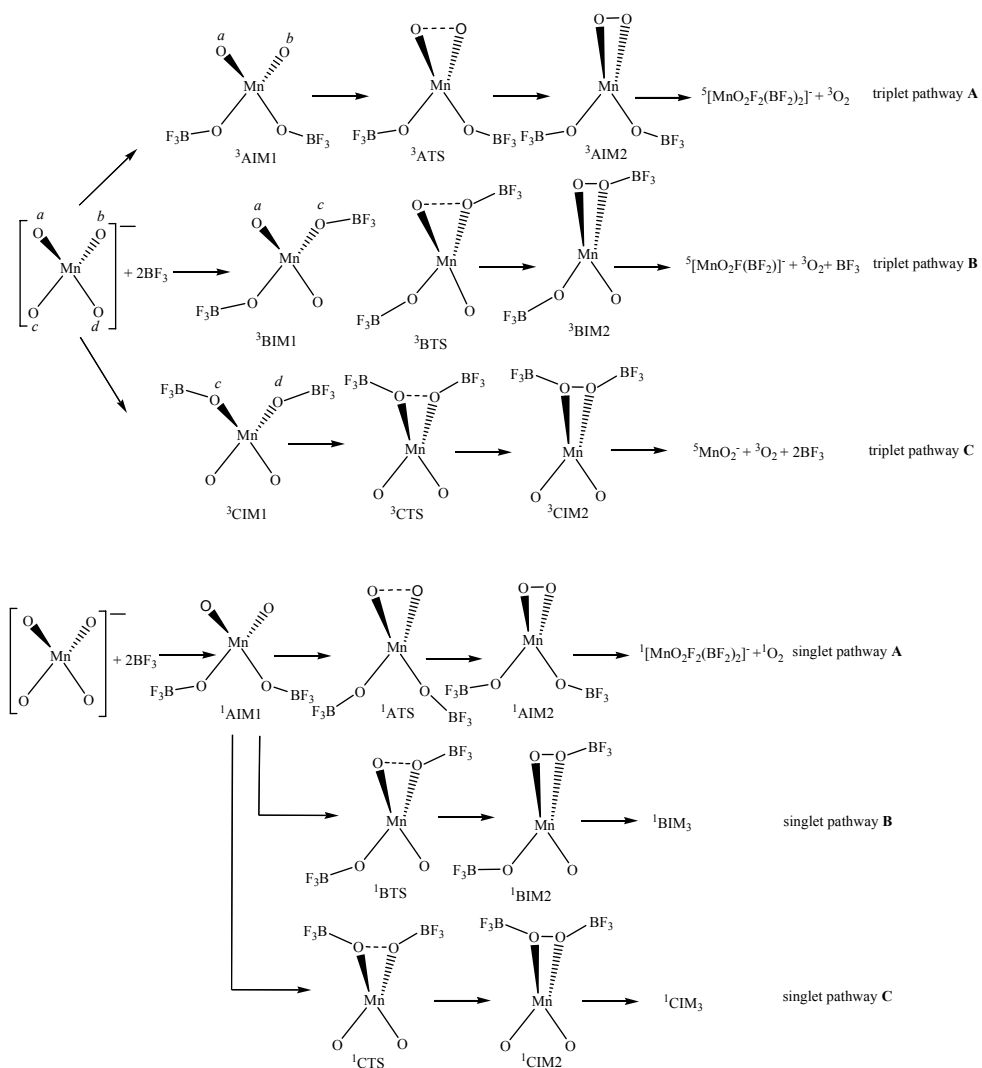

**Fig. S1** Possible singlet and triplet decomposition pathways of 1:2 adduct  $[\text{MnO}_4 \cdot 2\text{BF}_3]$ .

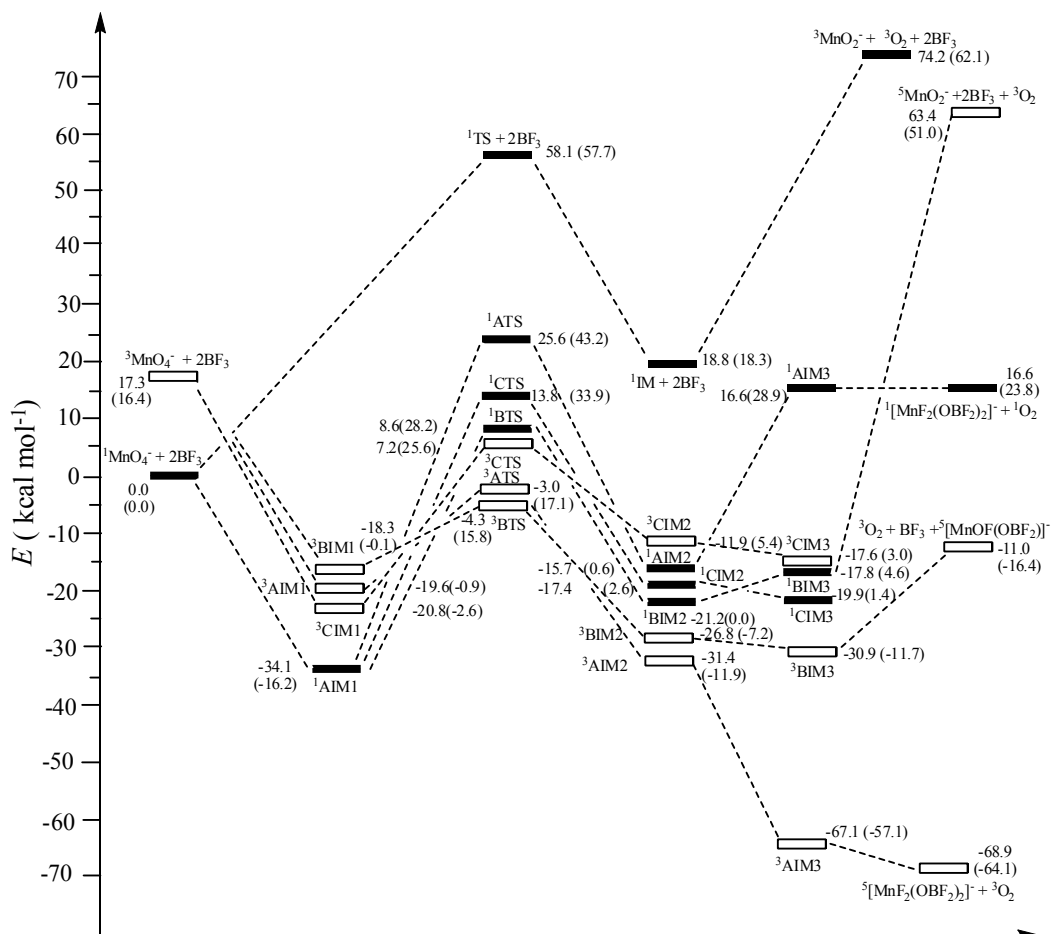

**Fig. S2** The potential energy profiles of the singlet and triplet reaction pathways of 1:2 adduct  $[\text{MnO}_4^- \cdot 2\text{BF}_3]$ . The relative energies are the electronic energy with zero-point energy and thermal corrections at 298 K in normal font while relative 298 K Gibb's free energies are in the parentheses.

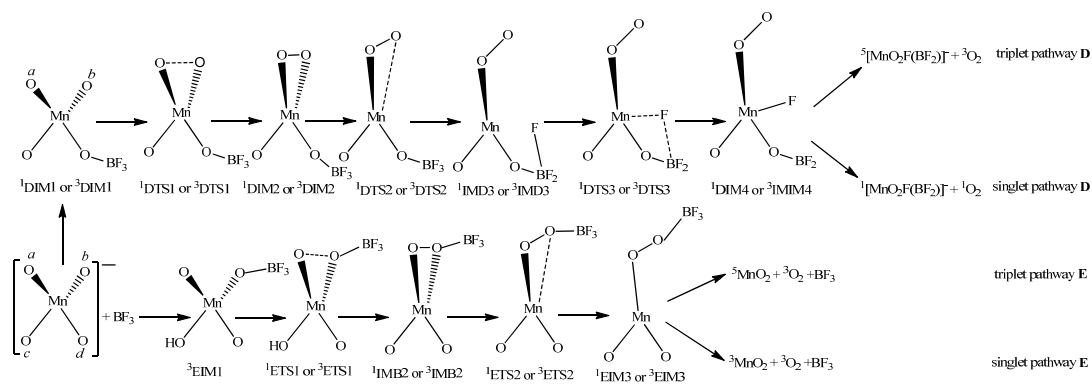

**Fig. S3** Possible singlet and triplet decomposition pathways of 1:1 adduct

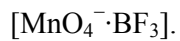

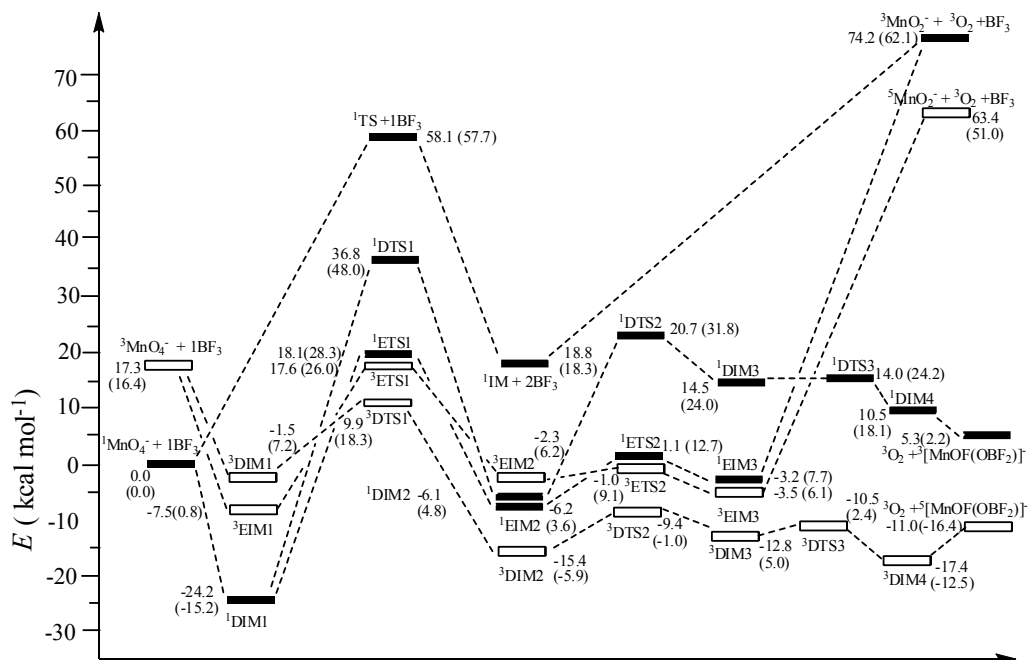

**Fig. S4** The potential energy profiles of the singlet and triplet reaction pathways of 1:1 adduct  $[\text{MnO}_4^- \cdot \text{BF}_3]$ . The relative energies are the electronic energy with zero-point energy and thermal corrections at 298 K in normal font while relative 298 K Gibb's free energies are in the parentheses.



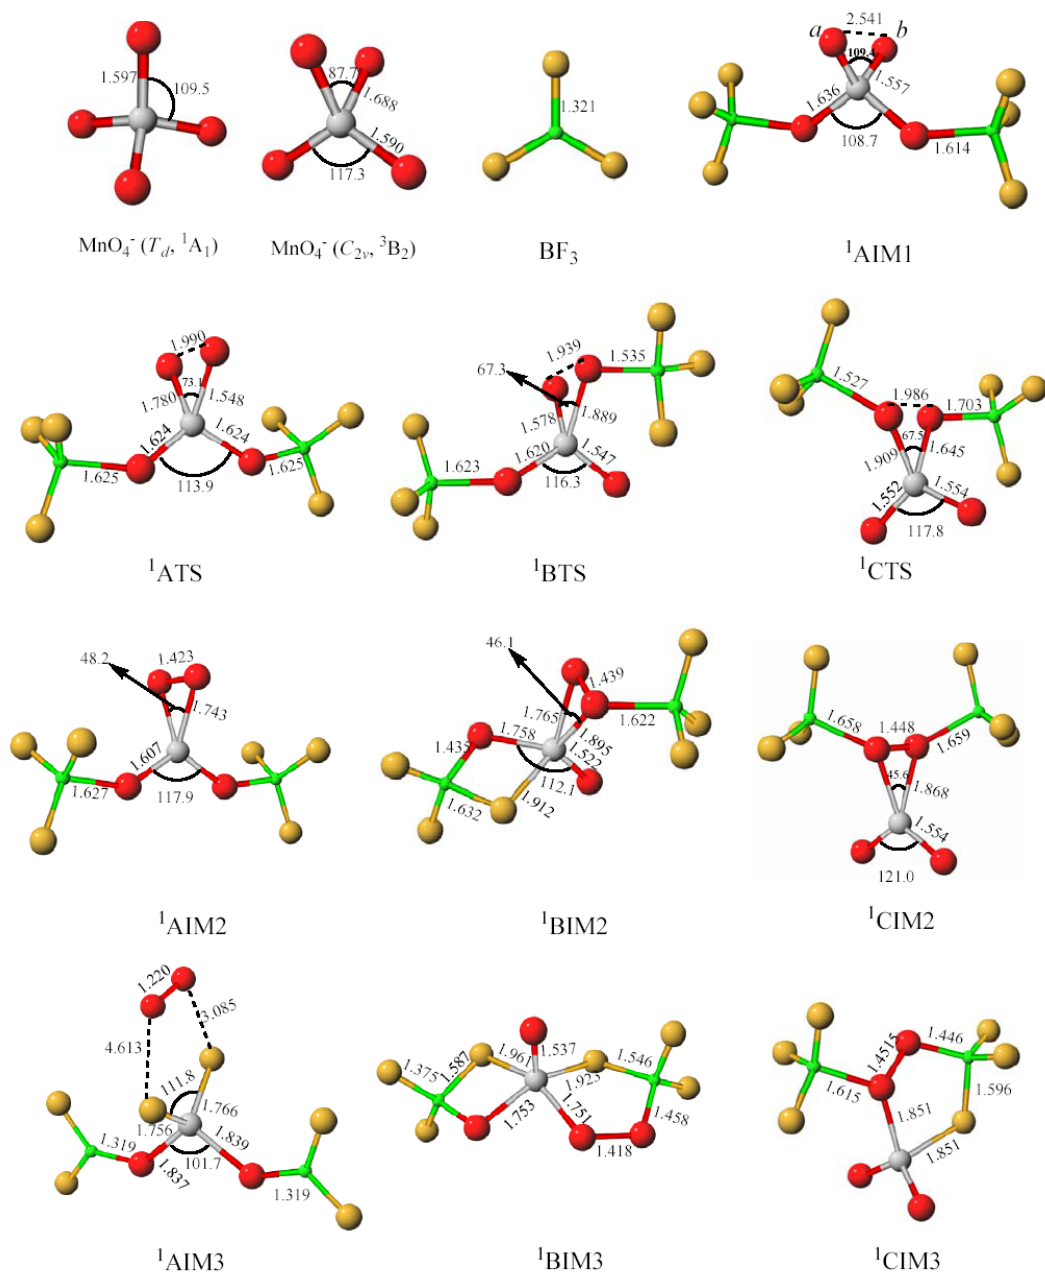

**Fig. S5** Optimized structures of the species involved in the triplet and singlet decomposition reactions of 1:2 adduct [MnO<sub>4</sub><sup>-</sup>·2BF<sub>3</sub>]. The bond distances are in angstroms and bond angles in degrees.

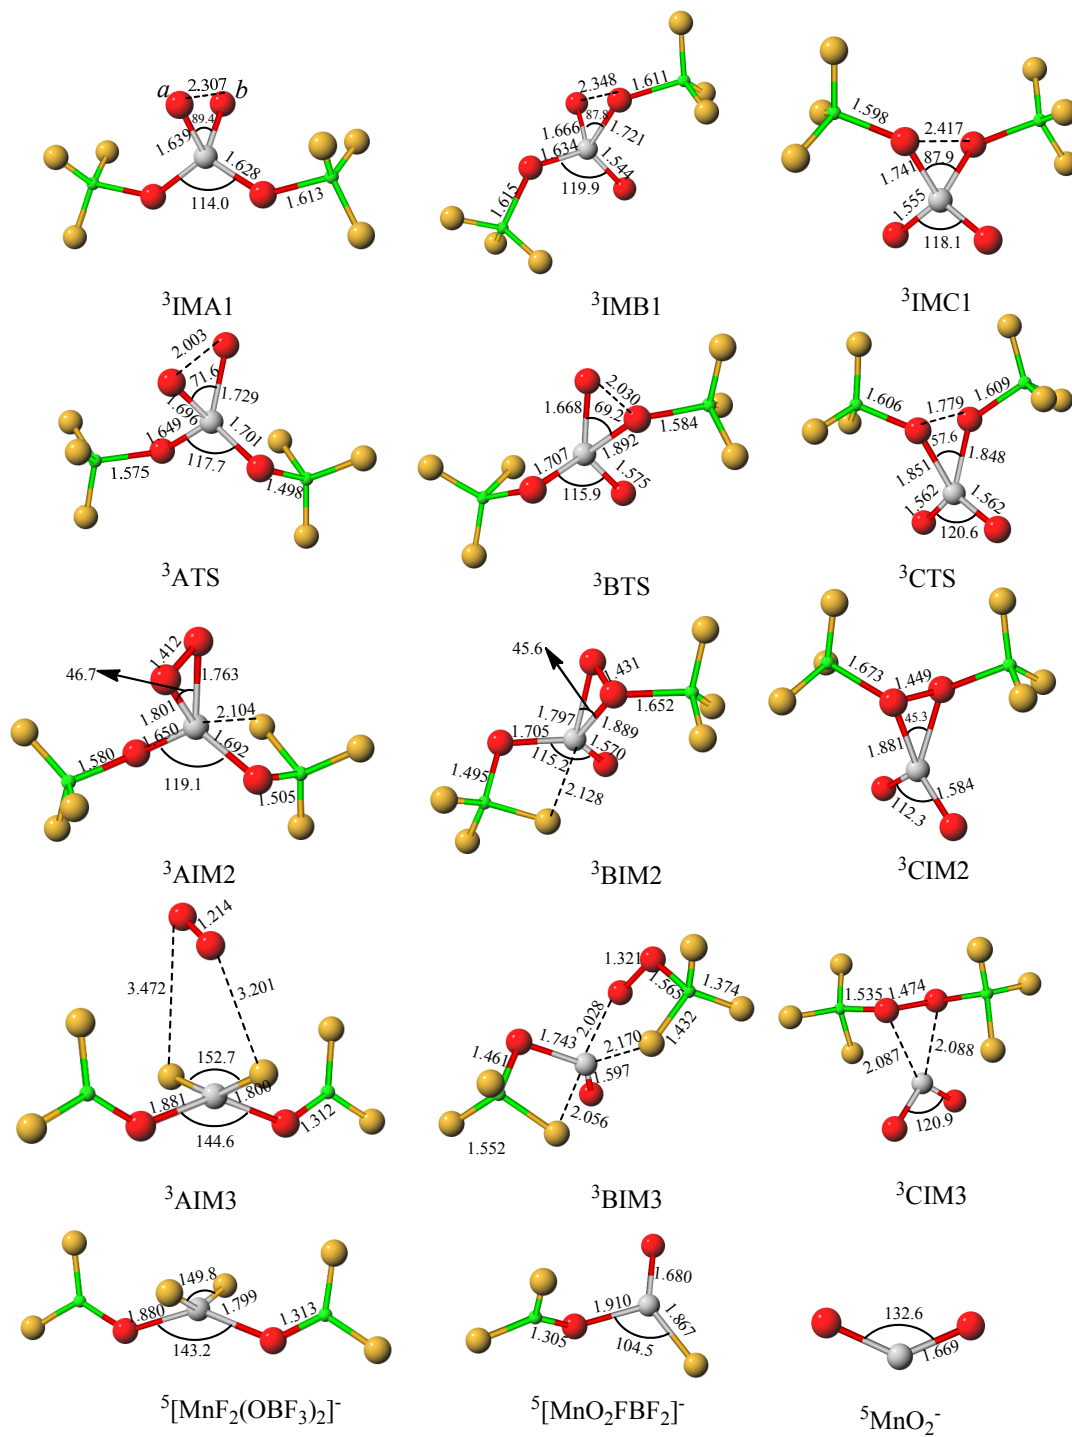

Fig. S5 (Continued)

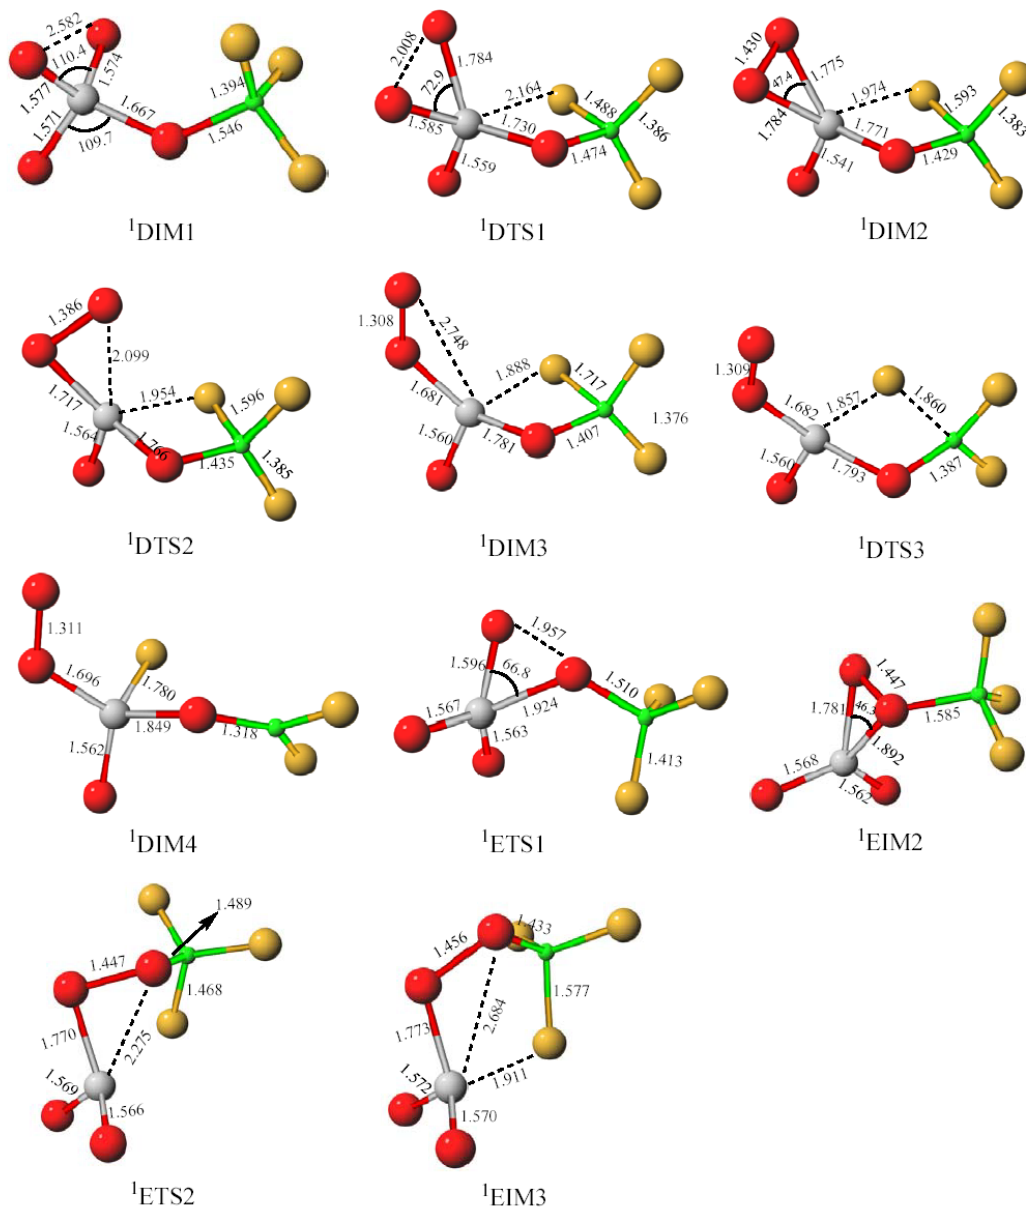

**Fig. S6** Optimized structures of the species involved in the triplet and singlet decomposition reactions of 1:1 adduct  $[\text{MnO}_4^- \cdot \text{BF}_3]$ . The bond distances are in angstroms and bond angles in degrees.

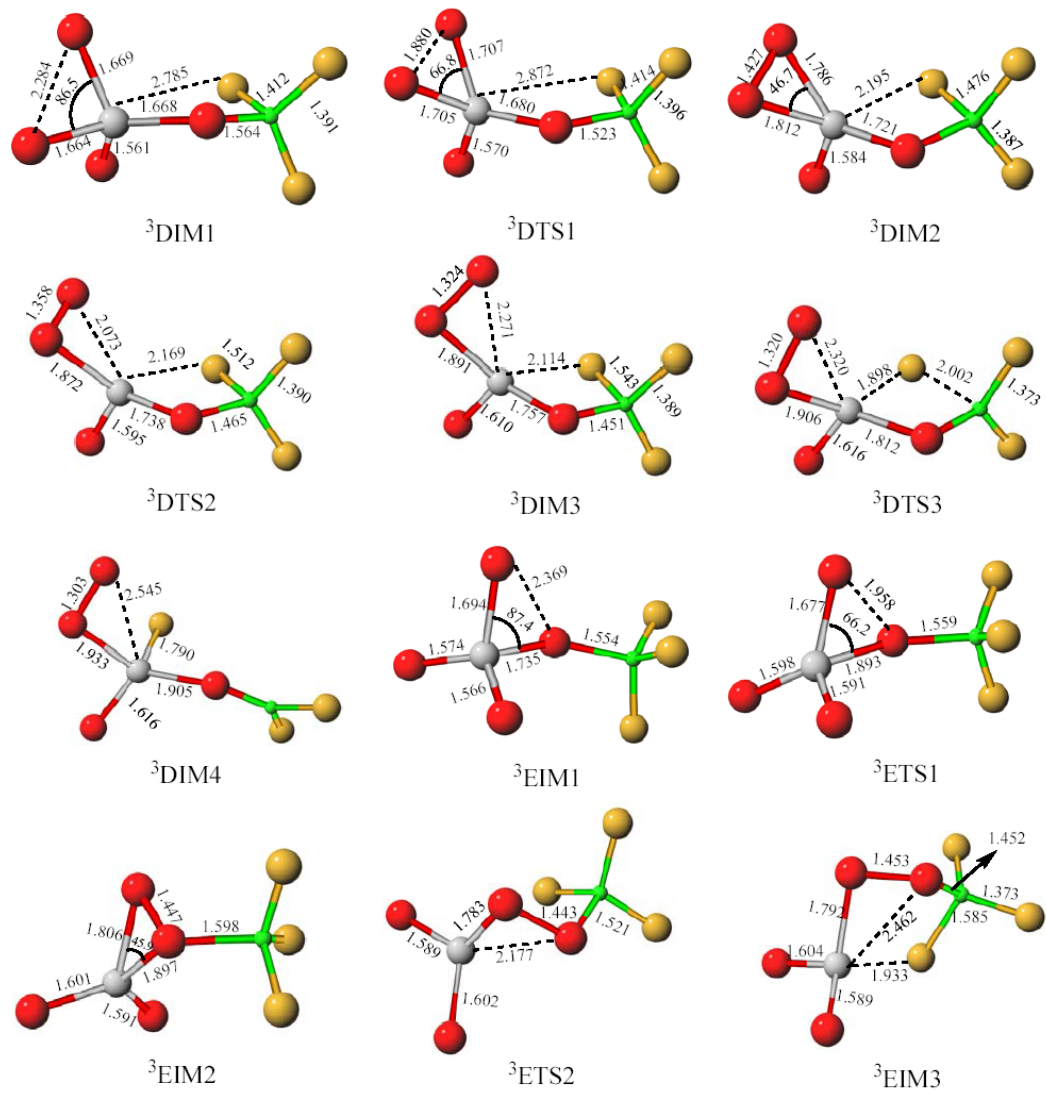

Fig. S6 (Continued)
